# Supplementary material for: Detect-seq, a chemical labeling and biotin pull-down approach for the unbiased and genome-wide off-target evaluation of programmable cytosine base editors
Source: Springer Nature journal article supplement (doi:10.1038/s41596-023-00837-4), 2023-06-05
Supplement: MOESM2 [file 41596_2023_837_MOESM2_ESM15.xlsx]

## Sheet: Spike-in model sequences
Name	sequence (forward strand)	Notes	Step	Purpose
Reference	AACTGATTGCCCGTCTCCGCTCGCTGGGTGAACAACTGAACCGTGATGTCAGCATGACGTTATCTGGCGGTGGAGATGGCTCCGTGTGGCAGAGCTGAAAGAGGAGCTTGATGACACGTAATGCTTGCGTGGCAAAC		Used in Step 5	This spike-in is used as an internal control for qPCR.
dU:dA-1	AACTGATTGCCCGTCTCCGCTCGCTGGGTGAACAACTGAACCGTGAT^TCAGCATGACGGCGGTAAGCACGAACTCAGGCTCCGTGTGGCAGAGCTGAAAGAGGAGCTTGATGACACGGGAAATACCGTGGTGTGGC	The red ^ indicates the position where dU is on the forward strand (with a dA on the reverse strand).		This spike-in is used to verify whether fragments containing dU:dA are well enriched in Step 23-25.
dU:dA-2	AACTGATTGCCCGTCTCCGCTCGCTGGGTGAACAACTGAACCGTGAT^ TCAGCATGACGCATGAGTGCCCTCAGCAGTAGCTCCGTGTGGCAGAGCTGAAAGAGGAGCTTGATGACACGTCCAACCTTTAGGAGCCATG	The red ^ indicates the position where dU is on the forward strand (with a dA on the reverse strand). The AP-containing spike-in is generated from the "dU:dA-2" by excising the dU via Uracil DNA Glycosylase (UDG).		The dU:dA-2 spike-in is used to verify whether fragments containing dU:dA are well enriched in Step 23-25.The AP:dA spike-in is used to verify whether fragments containing abasic sites are well repaired in the Damage Repair steps (Step 13-15).
AP:dA
dG:dU	CCACGCTGACGGTTTCTAACCTGTACGGTATGGTCACCGGGATGGCGGA^GATATGCAGAGTCTGGTCGGCGGAACGGTGGTCCGGCGTAAGGTTTACGCCCGTTTTCTGGATGCGGTGAACTTCGTCA	The red ^ indicates the position where dU is on the forward strand (with a dG on the reverse strand).		This spike-in is used to verify whether fragments containing dU:dG are well enriched in Step 23-25.
d5fC:dG	AACTGATTGCCCGTCTCCGCTCGCTGGGTGAACAACTGAACCGTGAT^ TCAGCATGACGCATGAGTGCCCTCAGCAGTAGCTCCGTGTGGCAGAGCTGAAAGAGGAGCTTGATGACACGTCCAACCTTTAGGAGCCATG	The red ^ indicates the position where d5fC is on the forward strand (with a dG on the reverse strand)		This spike-in is used to indicate whether endogenouse d5fCTPs are well protected in Step 8-9.
SSB	AACTGATTGCCCGTCTCCGCTCGCTGGGTGAACAACTGAACCGTGAT^TCAGCATGACGGCGGTAAGCACGAACTCAGGCTCCGTGTGGCAGAGCTGAAAGAGGAGCTTGATGACACGGGAAATACCGTGGTGTGGC	The red ^ indicates the position where SSB is on the forward strand (with a dA on the reverse strand). The SSB is introduced by excising dU with UDG and the generated AP with Endonuclease IV.		This spike-in is used to verify whether fragments containing single strand breaks are well repaired in the Damage Repair steps (Step 13-15).
Footnotes	The underlining indicates the primer positions for the "PCR and qPCR primers".
	Note that several spike-in sequences share the same qPCR primer binding sites. Please be careful that some of them cannot be used in the same library simutaneously.

## Sheet: PCR and qPCR primers
name	sequence	Step	Purpose
Universal forward	CTGATTGCCCGTCTCCGCTC	Used in 42	Used as an universal forward primer when amplify all spike-in model sequences via PCR.
Control G:C forward	TTATCTGGCGGTGGAGATG	Used in 41	Used as a forward primer to amplify the Control G:C spike-in via qPCR.
Control G:C reverse	GTTTGCCACGCAAGCATTA	Used in 41 & 42	Used as a reverse primer to amplify the Control G:C spike-in via qPCR/PCR.
dU:dA-1 forward	GCGGTAAGCACGAACTCAG	Used in 41	Used as a forward primer to amplify the dU:dA-1 spike-in via qPCR.
dU:dA-1 reverse	GCCACACCACGGTATTTCC	Used in 41 & 42	Used as a reverse primer to amplify the dU:dA-1 spike-in via qPCR/PCR.
dU:dA-2 & AP:dA forward	CATGAGTGCCCTCAGCAGTA	Used in 41	Used as a forward primer to amplify the dU:dA-2 or AP:dA spike-in via qPCR.
dU:dA-2 & AP:dA forward	CATGGCTCCTAAAGGTTGGA	Used in 41 & 42	Used as a reverse primer to amplify the dU:dA-2 or AP:dA spike-in via qPCR/PCR.
dU:dG forward	GCAGAGTCTGGTCGGCGGAA	Used in 41	Used as a forward primer to amplify the dU:dG spike-in via qPCR.
dU:dG reverse	TGACGAAGTTCACCGCATCC	Used in 41 & 42	Used as a reverse primer to amplify the dU:dG spike-in via qPCR/PCR.
d5fC:dG forward	CATGAGTGCCCTCAGCAGTA	Used in 41	Used as a forward primer to amplify the d5fC:dG spike-in via qPCR.
d5fC:dG reverse	CATGGCTCCTAAAGGTTGGA	Used in 41 & 42	Used as a reverse primer to amplify the d5fC:dG spike-in via qPCR/PCR.
SSB-forward	GCGGTAAGCACGAACTCAG	Used in 41	Used as a forward primer to amplify the SSB spike-in via qPCR.
SSB-reverse	GCCACACCACGGTATTTCC	Used in 41 & 42	Used as a reverse primer to amplify the SSB spike-in via qPCR/PCR.
Footnotes	When performing PCR to verify Tandem C-to-T muation ratio, use Universal forward primer and the corresponding reverse primer (for example, use the Universal forward and the dU:dA-1 reverse primer to amplify the dU:dA-1 spike-in).
	When performing qPCR to measure the level of enrichment, use the corresponding forward and reverse primer pairs (for example, use the dU:dA-1 forward and the dU:dA-1 reverse primer to perform qPCR on the dU:dA-1 spike-in).
	Note that several spike-in sequences share the same qPCR primer binding sites. Please be careful that some of them cannot be used in the same library simutaneously.
